# Supplementary material for: FtsH4 protease controls biogenesis of the PSII complex by dual regulation of high light-inducible proteins
Source: PubMed Central journal article supplement — Plant Commun. 2022 Dec 5;4(1):100502. doi: 10.1016/j.xplc.2022.100502 (PMC9860182; doi:10.1016/j.xplc.2022.100502), 2022-12-05
Supplement: mmc1.pdf [file mmc1.pdf]

**Plant Communications, Volume 4**

**Supplemental information**

**FtsH4 protease controls biogenesis of the PSII complex by dual regulation of high light-inducible proteins**

**Vendula Krynická, Petra Skotnicová, Philip J. Jackson, Samuel Barnett, Jianfeng Yu, Anna Wysocka, Radek Kaňa, Mark J. Dickman, Peter J. Nixon, C. Neil Hunter, and Josef Komenda**

## **Supplementary Information**

**Supplementary Figures:**

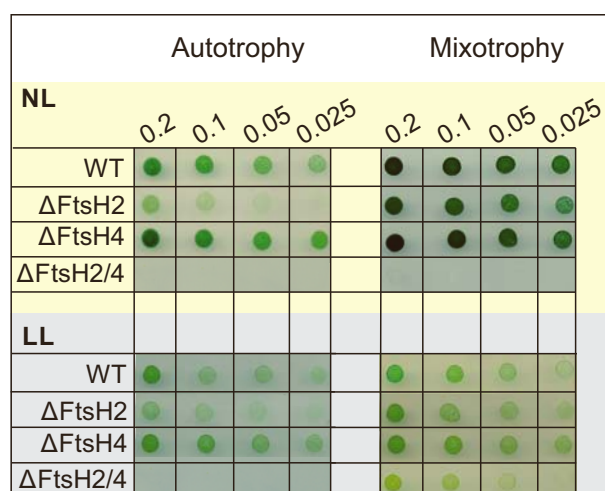

**Supplementary Figure S1. Growth assay of WT, ΔFtsH2, ΔFtsH4, and ΔFtsH2/4 strains.** Cells grown to exponential phase in liquid medium at normal light (NL, 40 μmol photons m<sup>-2</sup> s<sup>-1</sup>) were diluted to OD<sub>750nm</sub> of 0.2, 0.1, 0.05, and 0.025, transferred on agar plates and exposed to NL or low light (LL, 5 μmol of photons m<sup>-2</sup> s<sup>-1</sup>) under autotrophic or mixotrophic conditions (5mM glucose supplement).

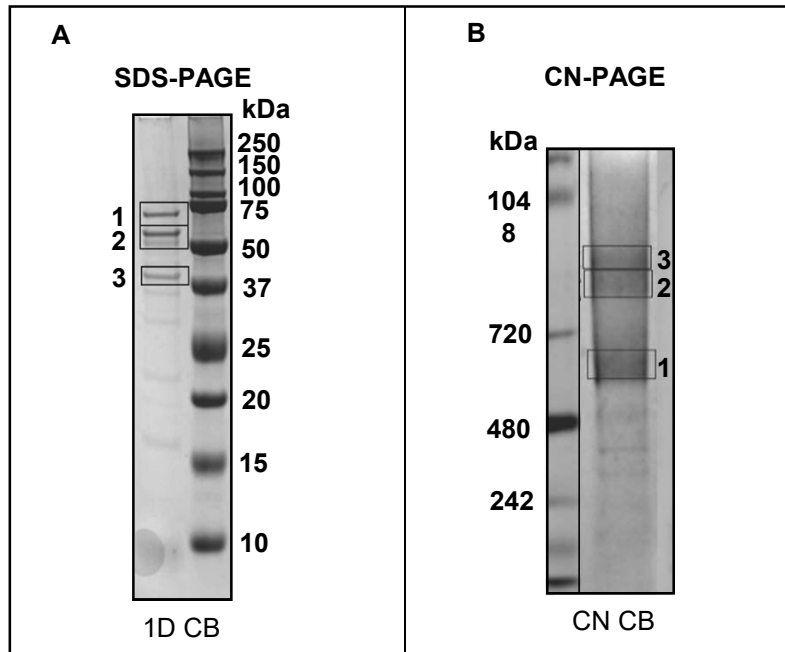

**Supplementary Figure S2. In gel MS protein analysis of the F4CF/ $\Delta$ FtsH2 pulldown.** Pulldowns of FLAG-tagged FtsH4 isolated from the strain additionally lacking FtsH2 (F4CF/ $\Delta$ FtsH2) were analyzed by 1D SDS-PAGE (**A**) or CN-PAGE (**B**). Gels were stained by Coomassie Blue (CB). Protein bands in rectangles were cut out and analyzed by MS (MS results of SDS-PAGE or CN-PAGE are presented in Supplementary Table 2, 3 and Supplementary Dataset 2, respectively).

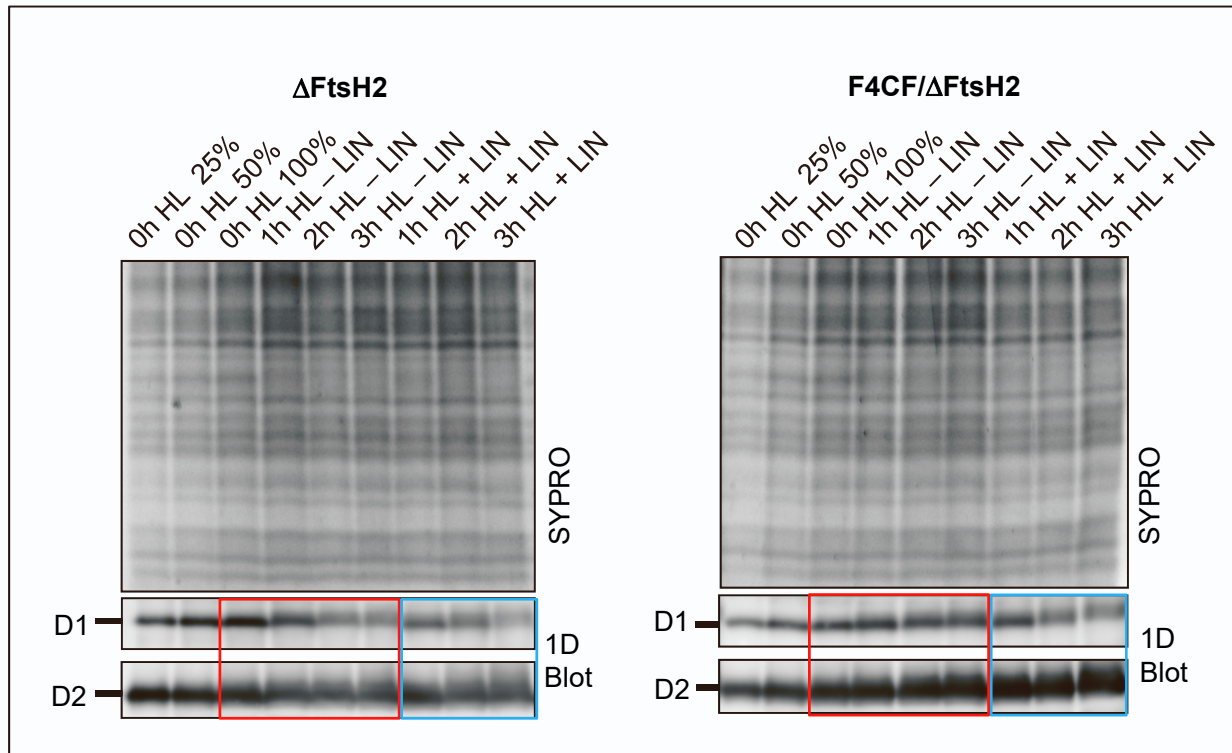

**Supplementary Figure S3. The degradation of D1 and D2 proteins of photosystem II in the FtsH2-less ( $\Delta FtsH2$ ) and FtsH2-less strain overexpressing FLAG-tagged FtsH4 (F4CF/ $\Delta FtsH2$ ) under HL conditions.** Cells were exposed to HL ( $500 \mu\text{mol of photons m}^{-2} \text{s}^{-1}$ ) in the presence or absence of lincomycin (+LIN or -LIN, respectively) and their D1 and D2 protein content was assessed by immunoblotting using specific antibodies. Each sample contained  $2 \mu\text{g}$  of Chl which corresponds to 100% in the dilution line. SYPRO Orange stained gel (SYPRO) is shown to document the equal loading.

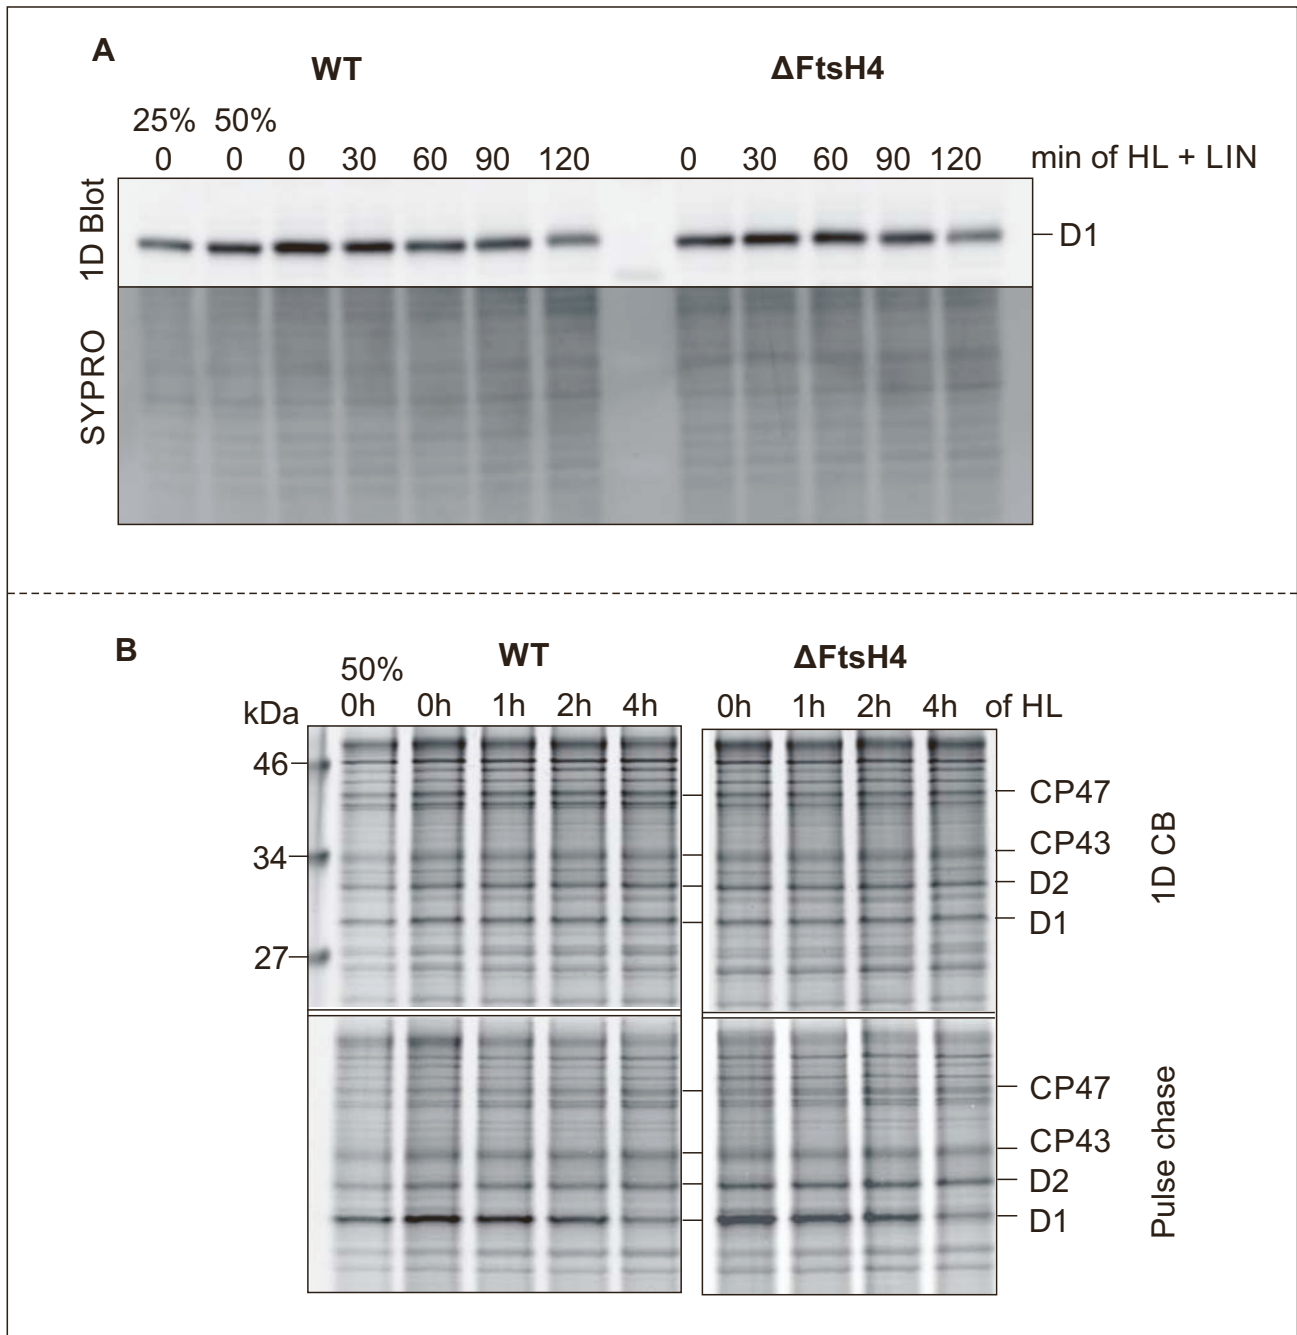

**Supplementary Figure S4. Degradation of the D1 protein in WT and FtsH4-less strain ( $\Delta$ FtsH4) under HL.** **A:** Cells were exposed to HL ( $500 \mu\text{mol of photons m}^{-2} \text{s}^{-1}$ ) in the presence of lincomycin (LIN) to prevent protein synthesis. Cell membranes were analyzed after 30, 60, 90, and 120 min of HL by immunoblotting using a specific antibody against D1. SYPRO Orange stained gel (SYPRO) is presented as a loading control. **B:** Degradation of D1 in HL monitored by radioactive pulse-chase labeling. Cells of both strains were subjected to  $250 \mu\text{mol of photons m}^{-2} \text{s}^{-1}$  for 20 min in the presence of  $^{35}\text{S}$  Met/Cys (0h). Then the cells were washed, supplemented with unlabeled Met/Cys, and subjected to HL. Membranes isolated from the labeled cells were analyzed by 1D SDS-PAGE. Each sample contained  $2 \mu\text{g}$  of Chl which corresponds to 100% in the dilution line. The gel was stained with Coomassie Blue (CB) and, after drying, exposed in a phosphorimager overnight (Pulse chase).

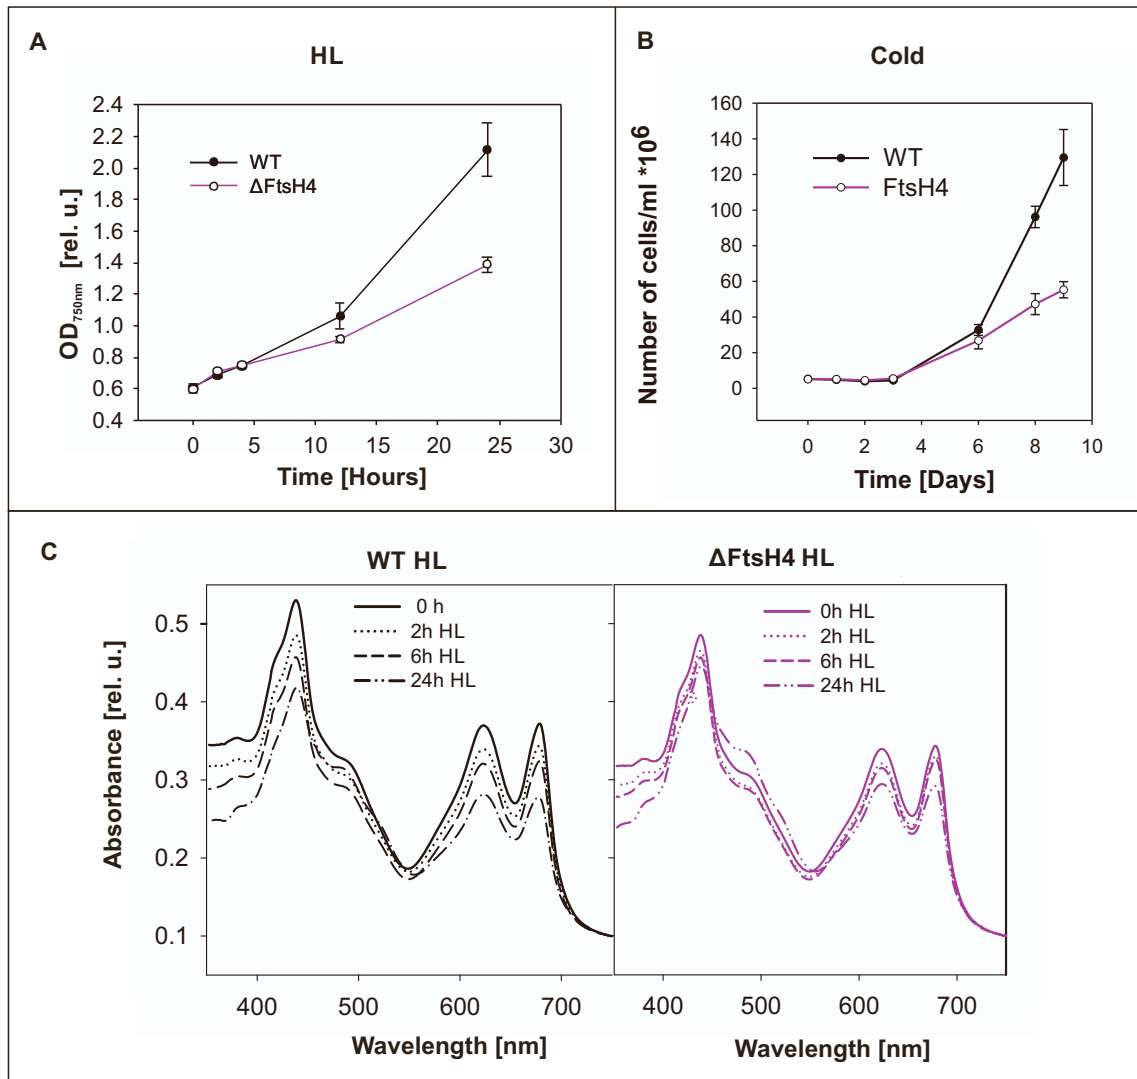

**Supplementary Figure S5: Phenotype of WT and  $\Delta$ FtsH4 under HL and cold stress conditions.** **A and B:** Growth of WT and  $\Delta$ FtsH4 cells during 24 h of the HL exposure ( $500 \mu\text{mol}$  of photons  $\text{m}^{-2} \text{s}^{-1}/28^\circ\text{C}$ ) monitored by  $\text{OD}_{750\text{nm}}$  measurement (A); and 9 days of cold stress ( $160 \mu\text{mol}$  of photons  $\text{m}^{-2} \text{s}^{-1}/18^\circ\text{C}$ ) monitored by cell counting using Multisizer 4, aperture  $20 \mu\text{m}$  (B). Before the stress, cells were grown to exponential phase at normal light ( $40 \mu\text{mol}$  of photons  $\text{m}^{-2} \text{s}^{-1}/28^\circ\text{C}$ ) then diluted to  $\text{OD}_{750\text{nm}}$  0.5 and exposed to the stress. Values are means of three biological replicates  $\pm$  SD. **C:** Whole-cell absorption spectra of WT and  $\Delta$ FtsH4 after 0, 2, 6, and 24 h of HL exposure.

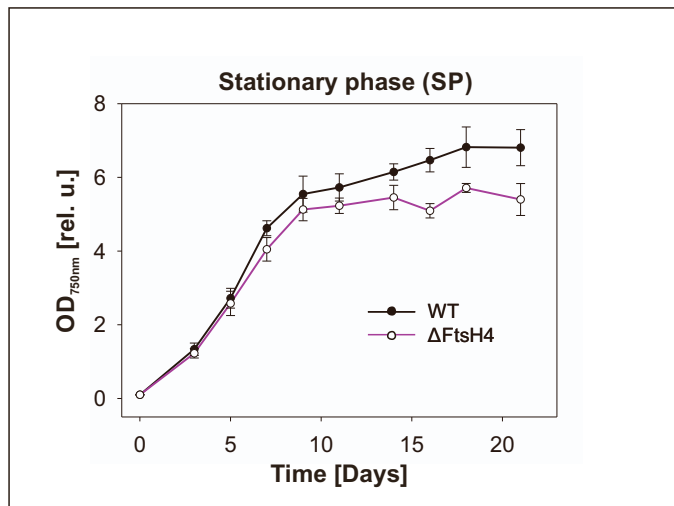

**Supplementary Figure S6: Growth of WT and  $\Delta$ FtsH4 until the stationary phase.** WT and  $\Delta$ FtsH4 cells in the exponential phase were diluted to OD<sub>750nm</sub> 0.1 and grown without any other dilution for 21 days at NL. Both WT and  $\Delta$ FtsH4 cells reached the stationary phase approximately on the 9th day. The final OD<sub>750nm</sub> of the WT and  $\Delta$ FtsH4 culture on 21st day of the growth was 6.8 or 5.4, respectively. Values are means of the four biological replicates  $\pm$  SD.



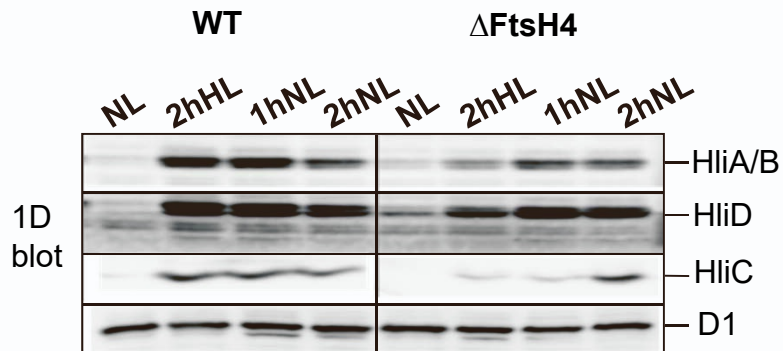

**Supplementary Figure S7. Effect of *ftsH4* deletion on induction and accumulation of Hlips.** Cells in exponential phase were grown at normal light (NL,  $40 \mu\text{mol}$  of photons  $\text{m}^{-2} \text{s}^{-1}$ ) and then exposed for 2 h to HL ( $500 \mu\text{mol}$  of photons  $\text{m}^{-2} \text{s}^{-1}$ , 2hHL) and then again shifted back to NL for 1 and 2 h (1hNL and 2hNL, respectively). Membranes isolated from the treated cells were analyzed by 1D SDS-PAGE/immunoblotting (1D blot). D1 signal was used as a loading control. Each loaded sample contained  $1 \mu\text{g}$  of Chl. Antibodies specific for HliA/B, HliC, HliD, and D1 were used for immunoblotting.

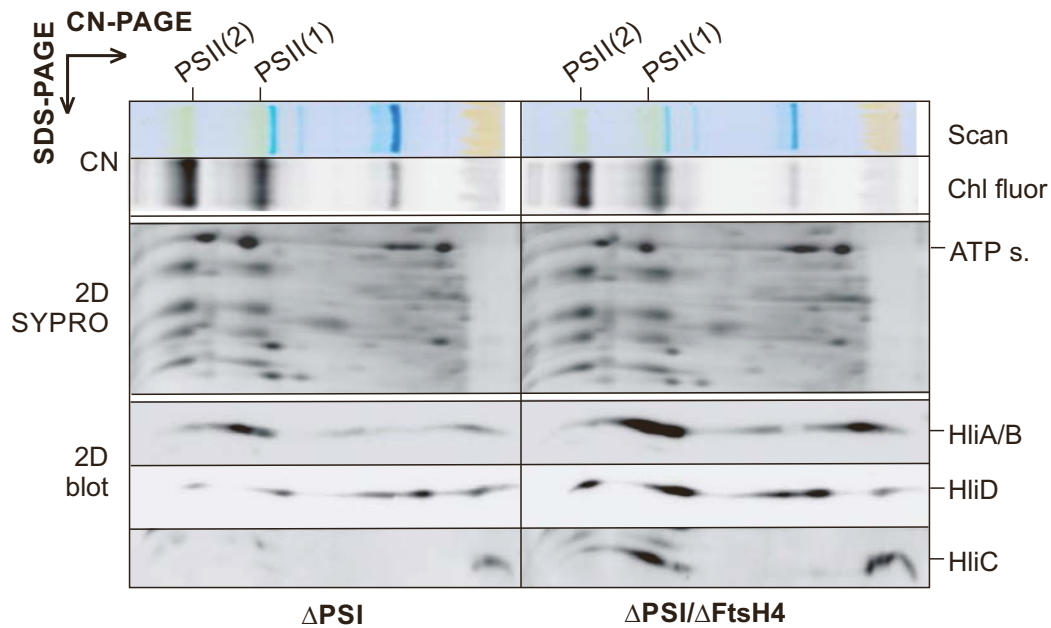

**Supplementary Figure S8. Effect of *ftsH4* deletion on Hlips accumulation in PSI-less mutant.** The membranes from PSI-less mutant ( $\Delta$ PSI) and double mutant additionally lacking *FtsH4* ( $\Delta$ PSI/ $\Delta$ FtsH4) grown heterotrophically at low light ( $5 \text{ mM}$  glucose,  $5 \mu\text{mol}$  of photons  $\text{m}^{-2} \text{s}^{-1}$ ) were analyzed by 2D CN/SDS-PAGE. The CN gel was scanned (Scan) and its Chl autofluorescence detected (Chl fluor). The gel was stained by SYPRO Orange (SYPRO), electroblotted to PVDF membrane and the blot probed with antibodies specific for HliA/B, HliC, and HliD (2D blot). Each loaded sample contained  $1.5 \mu\text{g}$  of Chl, the SYPRO stained gel documents the equal loading. Designation of complexes: PSII(1) and PSII(2): PSII monomer and dimer, respectively; ATP s.:  $\alpha/\beta$  subunits of ATP synthase.

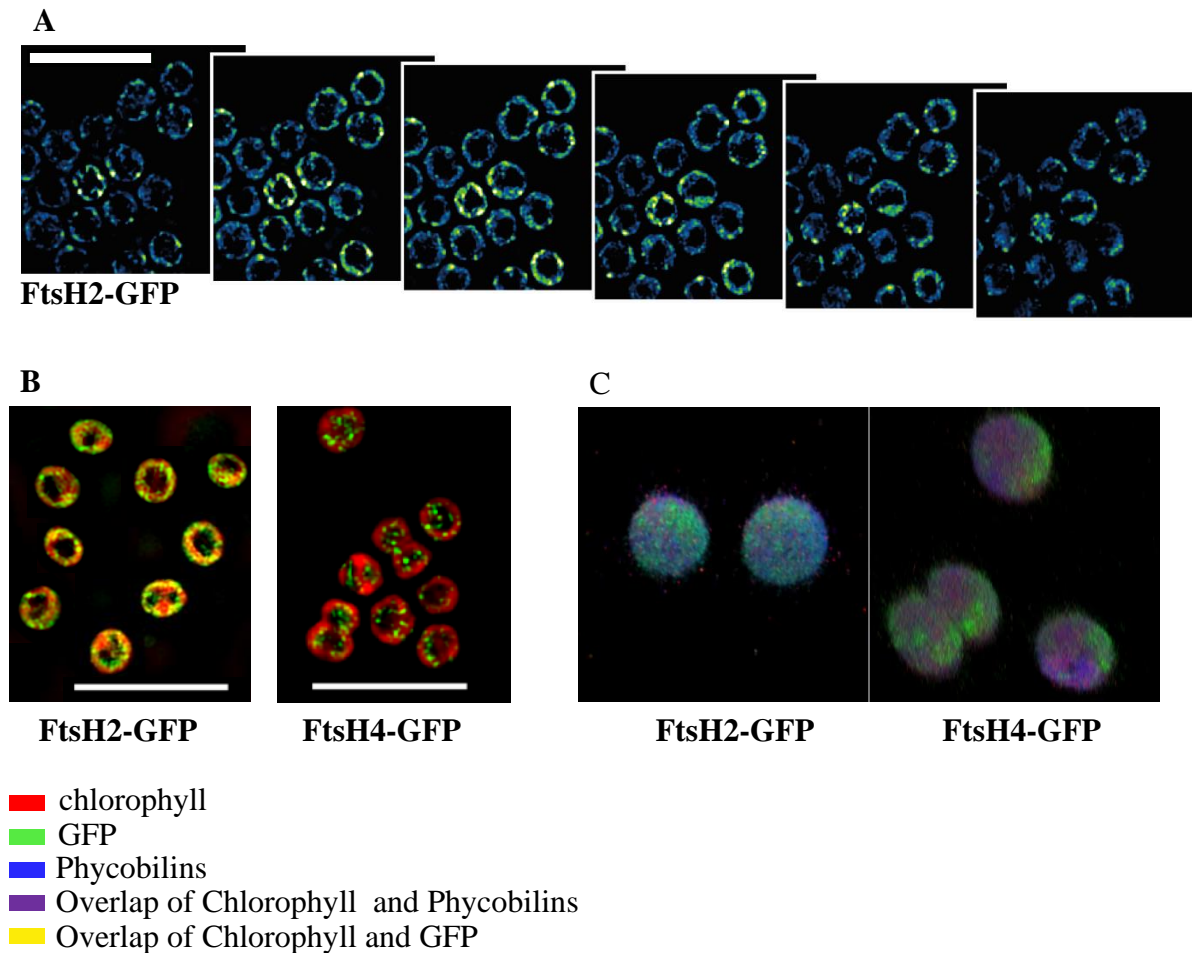

**Supplementary Figure S9. Localization of FtsH2-GFP protein in *Synechocystis*.** **A:** Axial slices used for Structured illumination microscopy (SIM) reconstructions of FtsH2-GFP (FtsH2 tagged with GFP). Descending axial slices are 125 nm apart and the scale bar is 5  $\mu\text{m}$ . **B and C:** Comparison of FtsH2-GFP with FtsH4-GFP. **B:** 2D SIM, the overlap of the GFP signal (in green) with the chlorophyll auto-fluorescence (in red). The diffuse signal of FtsH2-GFP is present across the entire thylakoid membrane system occasionally with areas of higher intensity. Scale bar is 5  $\mu\text{m}$ . **C:** 3D confocal microscopy. The overlap of the GFP signal with chlorophyll and phycobilisome auto-fluorescence in blue. Images were obtained using 8 2D slices with a thickness of 400 nm.

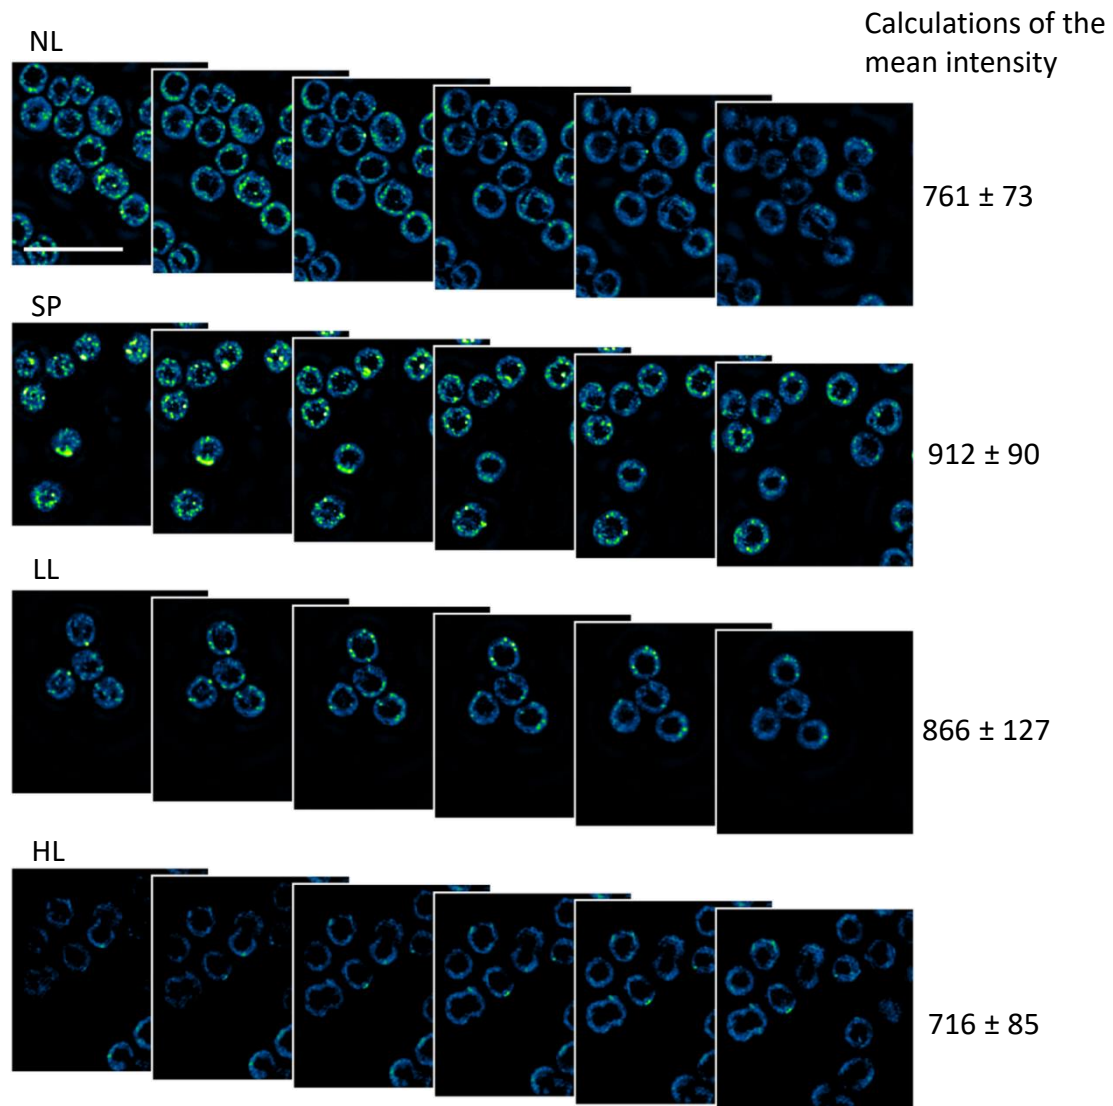

**Supplementary Figure S10. Structured Illumination microscopy of FtsH4-GFP expressing cells grown under different conditions.** FtsH4-GFP was imaged after acclimation to normal light (NL,  $40 \mu\text{mol photons m}^{-2} \text{s}^{-1}$ ), stationary phase (SP), low light (LL,  $5 \mu\text{mol photons m}^{-2} \text{s}^{-1}$ ), and high light (HL,  $500 \mu\text{mol photons m}^{-2} \text{s}^{-1}$ ). The images were placed on the same scale as at NL. The images are 125 nm apart axially and the scale bar represents 5  $\mu\text{m}$ .

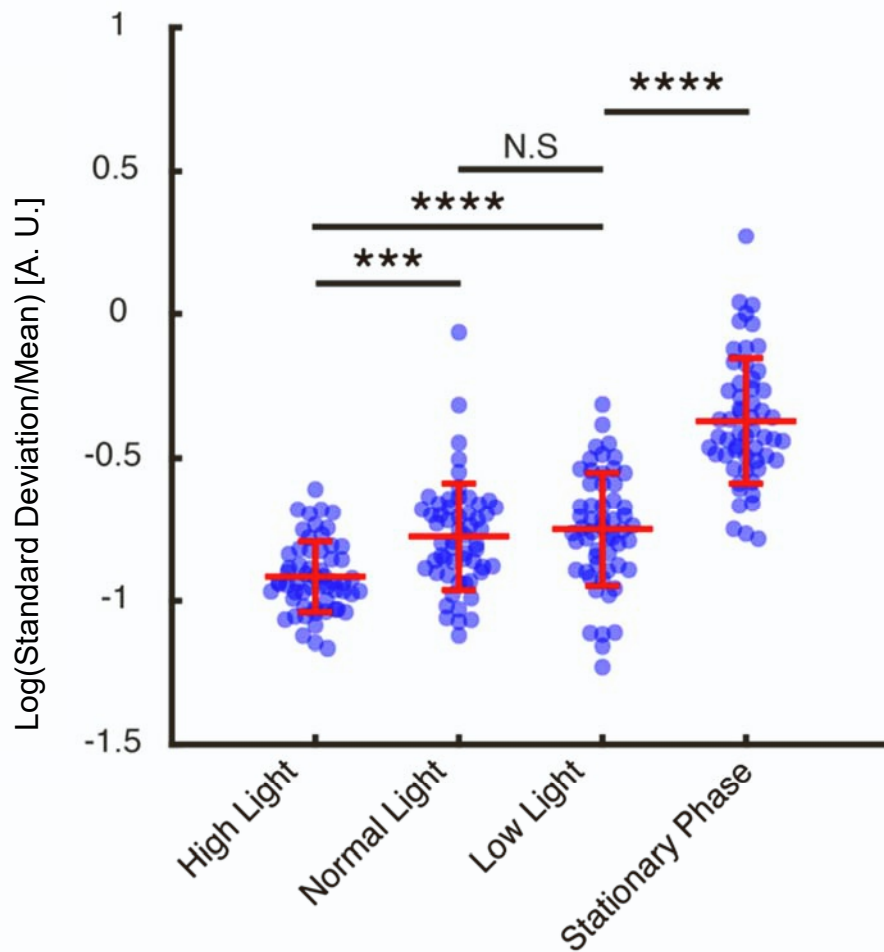

**Supplementary Figure S11. Analysis of the FtsH4-GFP inhomogeneity in TM under different light conditions.** The data was normalised against the mean and log-transformed. High light: 500  $\mu\text{mol}$  of photons  $\text{m}^{-2}\text{s}^{-1}$ ; Normal light: 40  $\mu\text{mol}$  of photons  $\text{m}^{-2}\text{s}^{-1}$ ; Low light: 5  $\mu\text{mol}$  of photons  $\text{m}^{-2}\text{s}^{-1}$ . \*\*\*\*: P value  $< 5 \times 10^{-5}$ ; \*\*\*:  $p < 5 \times 10^{-4}$ ; N.S.: not significant;  $n = 50$  (50 cells represented by blue dots were analysed per each condition). P values and significance values were found with One-way ANOVA test with Tukey's Honestly Significant Difference Procedure. The error bars represent standard deviation of the calculated parameter Log(Standard Deviation/Mean).

## Supplementary Tables:

**Supplementary Table S1. Relative quantification of FtsH4 and core photosystem subunits in wild type *Synechocystis* thylakoid membranes.**

| <b>Protein</b>        | <b>FtsH4</b> | <b>D1</b> | <b>D2</b> | <b>PsaA</b> | <b>PsaB</b> |
|-----------------------|--------------|-----------|-----------|-------------|-------------|
| <b>Ratio to FtsH4</b> | 1.0          | 18.4      | 35.7      | 54.0        | 54.4        |
| <b>P value</b>        |              | 0.0021    | 0.0034    | 0.0035      | 0.0025      |

Proteins extracted from thylakoid membranes were digested and the resultant proteolytic peptides analyzed by nanoLC-MS. The mass spectra were processed by searching against the *Synechocystis* sp. PCC 6803 reference proteome database using Byonic software. Relative quantification was performed by the label-free iBAQ method and expressed relative to FtsH4. P values were calculated using Student's t-test (paired, 2-sided) from 3 technical replicates (Supplementary Dataset 1).

**Supplementary Table S2. Identification of major proteins in the F4CF/ $\Delta$ FtsH2 FLAG pulldown resolved by SDS-PAGE.**

|               | <b>Protein</b>  | <b>P value</b> | <b>Best score</b> | <b>Total Intensity</b> | <b># of spectra</b> | <b># of unique peptides</b> | <b># of mod peptides</b> | <b>Coverage %</b> | <b># AA's in protein</b> |
|---------------|-----------------|----------------|-------------------|------------------------|---------------------|-----------------------------|--------------------------|-------------------|--------------------------|
| <b>Band 1</b> | FtsH4 (S111463) | 1.3E-105       | 791               | 1047474290             | 88                  | 31                          | 4                        | 61                | 628                      |
| <b>Band 2</b> | FtsH4 (S111463) | 1.6E-93        | 829               | 1550259100             | 78                  | 25                          | 4                        | 45                | 628                      |
| <b>Band 3</b> | FtsH4 (S111463) | 5.1E-47        | 579               | 336645242              | 36                  | 19                          | 3                        | 36                | 628                      |

Protein bands 1, 2, and 3 (Supplementary Figure S2A) were excised and subjected to in gel digestion with trypsin. The proteolytic peptides were extracted and analyzed by nanoLC-MS and the mass spectra processed by searching against the *Synechocystis* sp. PCC 6803 reference proteome database using Byonic software. See Materials and Methods for further details. The search results are shown in the accompanying worksheets and have been filtered to remove common exogenous protein contaminants and identifications with P value > 0.05. The 'best score' refers to the highest scoring peptide spectrum match for the protein identification.

**Supplementary Table S3: Relative quantification of the FtsH homologs and Sll1106 in bands obtained by separation of F4CF/ $\Delta$ FtsH2 FLAG pulldown by CN-PAGE.**

| Protein              | Percentage of FtsH4 |               |               |
|----------------------|---------------------|---------------|---------------|
|                      | Band 1              | Band 2        | Band 3        |
| FtsH1/ Slr1390       | 0.08                | 0.02          | 0.04          |
| FtsH3/Slr1604        | 0.17                | 0.22          | 0.13          |
| <b>FtsH4/Sll1463</b> | <b>100.00</b>       | <b>100.00</b> | <b>100.00</b> |
| Sll1106              | 9.77                | 8.23          | 8.98          |

Purified proteins were separated by CN-PAGE resulting in the three most abundant bands of approximate size 600, 820, and 900 kDa (Supplementary Fig. S2B). Band composition was analyzed by MS and the proportion of FtsH paralogs and Sll1106 was assessed by quantitative MS analysis using the sum of their iBAQ abundance scores. Relative quantification is expressed as percentage of FtsH4. For details see Supplementary Dataset 2.



**Supplementary Table S4. Transcript levels of HL inducible genes in WT,  $\Delta$ FtsH4, A3, and F4CF after short (30 min) and long (24 h) term HL exposure.**

|              | WT NL | SD   | $\Delta$ FtsH4 NL | SD   | WT 30' HL | SD   | $\Delta$ FtsH4 30' HL | SD   | WT 24h HL | SD   | $\Delta$ FtsH4 24h HL | SD   |
|--------------|-------|------|-------------------|------|-----------|------|-----------------------|------|-----------|------|-----------------------|------|
| <i>psbA2</i> | 0.00  | 0.15 | 0.08              | 0.02 | 1.94      | 0.31 | 1.95                  | 0.25 | 0.95      | 0.31 | 0.96                  | 0.36 |
| <i>psaA</i>  | 0.00  | 0.23 | 0.42              | 0.12 | -2.84     | 0.25 | -1.25                 | 0.53 | -0.73     | 0.20 | -0.41                 | 0.05 |
| <i>ftsH2</i> | 0.00  | 0.08 | -0.44             | 0.06 | 1.14      | 0.40 | 0.25                  | 0.09 | -2.42     | 0.42 | -1.57                 | 0.49 |
| <i>hliA</i>  | 0.00  | 0.23 | -0.33             | 0.04 | 3.86      | 0.69 | 2.36                  | 1.36 | -2.70     | 0.71 | -1.24                 | 0.69 |
| <i>hliB</i>  | 0.00  | 0.1  | -0.47             | 0.05 | 4.92      | 0.20 | 4.05                  | 1.25 | -0.18     | 0.49 | 0.92                  | 0.52 |
| <i>hliC</i>  | 0.00  | 0.09 | -0.23             | 0.03 | 4.83      | 0.99 | 4.43                  | 1.09 | 1.20      | 0.46 | 1.72                  | 0.13 |
| <i>hliD</i>  | 0.00  | 0.12 | -0.24             | 0.02 | 1.56      | 0.23 | 1.15                  | 0.64 | -3.02     | 0.30 | -15.27                | 0.56 |

|              | A3 NL | SD   | F4CF NL | SD   | A3 30' HL | SD   | F4CF 30' HL | SD   | A3 24h HL | SD   | F4CF 24h HL | SD   |
|--------------|-------|------|---------|------|-----------|------|-------------|------|-----------|------|-------------|------|
| <i>psbA3</i> | 0.00  | 0.30 | -0.70   | 0.07 | 1.77      | 0.35 | 2.62        | 0.03 | 2.01      | 0.34 | 1.77        | 0.08 |
| <i>psaA</i>  | 0.00  | 0.07 | -0.63   | 0.05 | -2.18     | 0.01 | -3.17       | 0.17 | -0.07     | 0.09 | -0.37       | 0.05 |
| <i>ftsH2</i> | 0.00  | 0.08 | -0.99   | 0.13 | 0.80      | 0.41 | 2.18        | 1.02 | -0.93     | 0.19 | -0.51       | 0.04 |
| <i>hliA</i>  | 0.00  | 0.30 | -0.71   | 0.19 | 2.87      | 0.52 | 6.18        | 0.49 | -0.41     | 0.16 | -1.40       | 0.11 |
| <i>hliB</i>  | 0.00  | 0.10 | -0.02   | 0.20 | 5.71      | 0.42 | 7.23        | 0.66 | 1.18      | 0.07 | 1.43        | 0.09 |
| <i>hliC</i>  | 0.00  | 0.15 | -0.79   | 0.10 | 4.69      | 0.30 | 6.06        | 0.47 | 0.66      | 0.04 | 0.84        | 0.05 |
| <i>hliD</i>  | 0.00  | 0.05 | -0.63   | 0.05 | -1.99     | 0.02 | -1.21       | 0.03 | 0.21      | 0.10 | 0.07        | 0.02 |

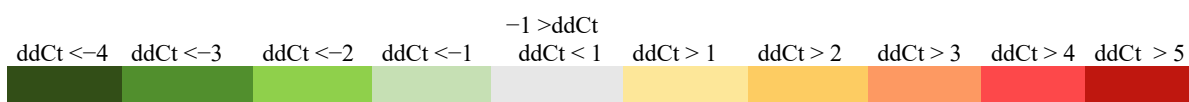

RNA was isolated from WT,  $\Delta$ FtsH4, A3, and F4CF cells grown under normal light ( $40 \mu\text{mol}$  of photons  $\text{m}^{-2} \text{s}^{-1}$ ) and after 30 min or 24 h of HL ( $500 \mu\text{mol}$  of photons  $\text{m}^{-2} \text{s}^{-1}$ ), respectively, according to Krynická et al. (2019). Expression of *hliA/B/C/D*, *psbA2*, *psaA*, and *ftsH2* transcripts was determined by RT PCR according to Krynická et al. (2014). Random primers were used for reverse transcription. Differential expression was presented using  $\Delta\Delta\text{Ct}$  model. *rnpB* was used as an internal control.  $\Delta\Delta\text{Ct}$  represents  $\Delta\text{Ct}(\text{control}) - \Delta\text{Ct}(\text{sample})$  which corresponds to  $-\log_2 FC(\text{control} - \text{sample})$ . WT NL was a control for all  $\Delta$ FtsH4 samples and HL treated WT samples and A3 NL was a control for all F4CF samples and HL treated A3 samples. Thus,  $\Delta\Delta\text{Ct}$  of the WT NL and A3 NL matches 0. Positive/negative  $\Delta\Delta\text{Ct}$  values correspond to more/less transcript compared to control. Means of 3 independent measurements  $\pm$  SD are presented.

**Supplementary Table S5. iBAQ quantification of major proteins in the F4CF pulldown.**

| <b>Protein</b>       | <b>iBAQ F4CF</b> | <b>% of FtsH4</b> | <b>Factor</b> | <b>P Value (T-test)</b> |
|----------------------|------------------|-------------------|---------------|-------------------------|
| <b>FtsH4/Sll1463</b> | 155.7            | 100.0             | 1.0           |                         |
| <b>Sll1106</b>       | 39.8             | 25.5              | 3.9           | 7.90E-04                |
| <b>HofG/PilA1</b>    | 10.1             | 6.5               | 15.4          | 8.50E-04                |
| <b>CurT/Slr0483</b>  | 5.3              | 3.4               | 29.4          | 3.10E-03                |
| <b>PsaD</b>          | 3.5              | 2.3               | 43.9          | 7.90E-02                |
| <b>CP47/PsbB</b>     | 2.3              | 1.5               | 66.6          | 8.10E-01                |

Proteins extracted from the FtsH4-FLAG eluate by immuno-precipitation were digested and the resultant proteolytic peptides analyzed by nanoLC-MS. The mass spectra were processed by searching against the *Synechocystis* sp. PCC 6803 reference proteome database using Byonic software. Non-specifically purified proteins (FLAG eluate from WT membranes were used as a control, Supplementary Dataset 3) were filtered from the search. Table displays the top 5 proteins specifically co-purified with FtsH4 sorted by iBAQ score (Supplementary Dataset 3). They are expressed relative to FtsH4.

**Supplementary Table S6. List of primers used in this study.**

| <b>construct</b> | <b>primer sequence</b>                                                                                          |
|------------------|-----------------------------------------------------------------------------------------------------------------|
| F4CF             | F: CGTATCCATATGGCCATCAAACCCCAACCC<br>R: TTACCATCTAGATACCACTAGGGTGCCAGGAGC                                       |
| SII1106-FLAG     | F: CTAGAGCATATGAGTGACTTAATTGTTATCGGC<br>R: GAGGACGCTAGCTTCCGCCGCTGGGACGCCATC                                    |
| $\Delta$ FtsH4   | F: ATGGCCATCAAACCCCAACCCCAATGGC<br>R: TTATACCACTAGGGTGCCAGGAGCTTG                                               |
| FtsH4-His        | F: GACGTCGCATGCTCCCGGCCG<br>R: GAGGACGGCGCCTTAATGATGATGATGATGATGTACCACTAGGGTGCCAGGAGC                           |
| FtsH4-His D515N  | F: GGCCCGTTGTAAATTATTGGCCGCGCCAG<br>F: CTGGCGCGGCCAATAATTTACAACGGGCC<br>R: GCAATAAGCCAGATCTCTAGCGCAGTCCCAACCAGG |
| His-HliD         | F:<br>TAATAACATATGCACCATCACCATCACCATCACCATGGAAGTGAAGAACTACAACCG<br>R: GCAATAAGCCAGATCTCTAGCGCAGTCCCAACCAGG      |
